# Supplementary material for: Electrospinning preparation and upconversion luminescence of yttrium fluoride nanofibers
Source: Royal Society of Chemistry journal article supplement (doi:10.1039/c2ce26160j), 2012-01-01
Supplement: c2ce26160j.pdf [file c2ce26160j.pdf]

## Electronic Supplementary Information

# Electrospinning Preparation and Upconversion Luminescence of Yttrium Fluoride Nanofibers

*Renyuan Yang, Weiye Song, Shusen Liu, Weiping Qin\**

5 State Key Laboratory on Integrated Optoelectronics, College of Electronic Science and Engineering,

Jilin University, Changchun 130012, P. R. China

E-mail: [wpqin@jlu.edu.cn](mailto:wpqin@jlu.edu.cn)

## 1. Experimental Procedure

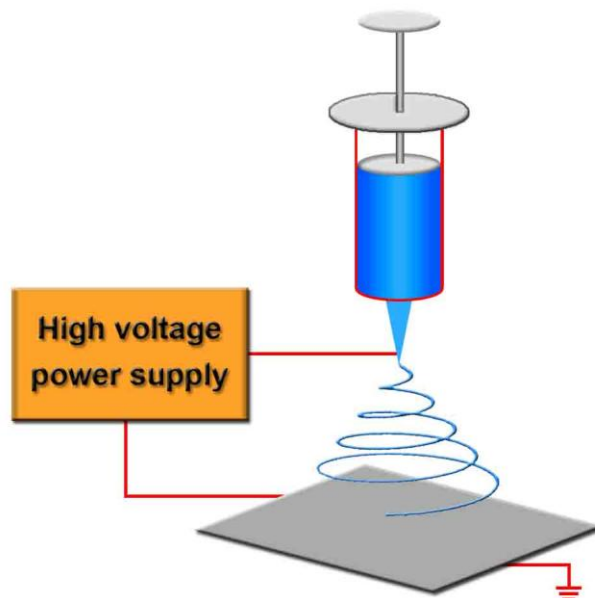

**Fig. S1** Schematic illustration of electrospinning of PVP/RE(CF<sub>3</sub>COO)<sub>3</sub> composite fibers.

### 5 Synthesis of PVP/RE(CF<sub>3</sub>COO)<sub>3</sub> fibers (RE = Y, La, Nd, Gd, Tm and Yb):

All the chemicals were used as received without purification. REO<sub>2</sub> (purity ≥ 99.99%) were supplied by Shanghai Chemical Reagent Company. Trifluoroacetic acid, PVP ( $M_w \approx 1\,300\,000$ ) and NH<sub>4</sub>HF<sub>2</sub> were purchased from Aldrich Company.

Polymer solution was prepared by dissolving 0.4 g PVP in 8 mL of ethanol and stirred for 6 h. Water solution of RE(CF<sub>3</sub>COO)<sub>3</sub> was prepared by mixing RE<sub>2</sub>O<sub>3</sub> (1.0 mmol) in deionized water (0.5 mL) and trifluoroacetic acid (1.6 mL). The mixture was then put in water bath at 50 °C. After the mixture became clear, it was added into polymer solution. After magnetic stirring for 2 h, uniform precursor solution for electrospinning was obtained.

As shown in Fig. S1, the precursor solution was loaded into a 1 mL plastic syringe. The solution flow rate was about 0.2 mL/h during electrospinning. The operation voltage was switched to 15.0 kV.

The distance between the syringe tip and collector was 12 cm. The relative humidity was less than 30%. Non-woven mat consisted of composite fibers was obtained on grounded aluminum foil. It was preserved carefully in a desiccator free from humidity.

### **Calcination of REOF fibers and REF<sub>3</sub> fibers:**

5 The as-fabricated mat was calcined at 300 °C for 24 h and then at 600 °C for 3 h in air so that PVP could be eliminated thoroughly. The temperature rose from room temperature and the rising rate was 5 °C/min. The calcinated sample cooled down to room temperature naturally. The as-calcinated fibers were loaded in a small crucible. A large crucible contained 5 g NH<sub>4</sub>HF<sub>2</sub>. The small crucible was put in the large one, making sure that REOF fibers did not directly contact with the NH<sub>4</sub>HF<sub>2</sub>. The large  
10 crucible was sealed and heated in a furnace at 400 °C for 6 h. The temperature rose from room temperature, with a heating rate of 5 °C/min. After fluoridization reaction, REF<sub>3</sub> fibers were obtained. In order to prepare YF<sub>3</sub> fibers codoped with Yb<sup>3+</sup> and Tm<sup>3+</sup>, stoichiometric amounts of Yb(CF<sub>3</sub>COO)<sub>3</sub> and Tm(CF<sub>3</sub>COO)<sub>3</sub> were mixed in the precursor solution for electrospinning. The preparation procedure of YF<sub>3</sub>:Yb<sup>3+</sup>,Tm<sup>3+</sup> fibers was same as that of YF<sub>3</sub> fibers.

### **15 2. Characterization**

XRD of samples was performed by X-ray diffractometer (mode Rigaku RU-200b), using nickel-filtered Cu K $\alpha$  radiation ( $\lambda = 1.54056 \text{ \AA}$ ). The size and morphology of the fibers before and after calcination process were inspected using a Hitachi S-4800 field emission scanning electron micrograph (FE-SEM). JEOL-2000ex TEM was employed to record the TEM images and selected area electron  
20 diffraction (SAED) images. Fourier transform infrared spectra (FTIR) of KBr powder-pressed pellets were recorded on a Fourier transform spectrometer (Perkin-Elmer, Spectrum 1). UC fluorescence spectra were recorded by a Hitachi F-4500 fluorescence spectrophotometer with a 980 nm diode laser

acting as excitation source. The spectral resolution was 1.0 nm. The high voltage of photomultiplier tube was 400 V. All measurements were performed at room temperature.

### 3. XRD Pattern of $\text{YF}_3 \cdot 1.5\text{NH}_3$

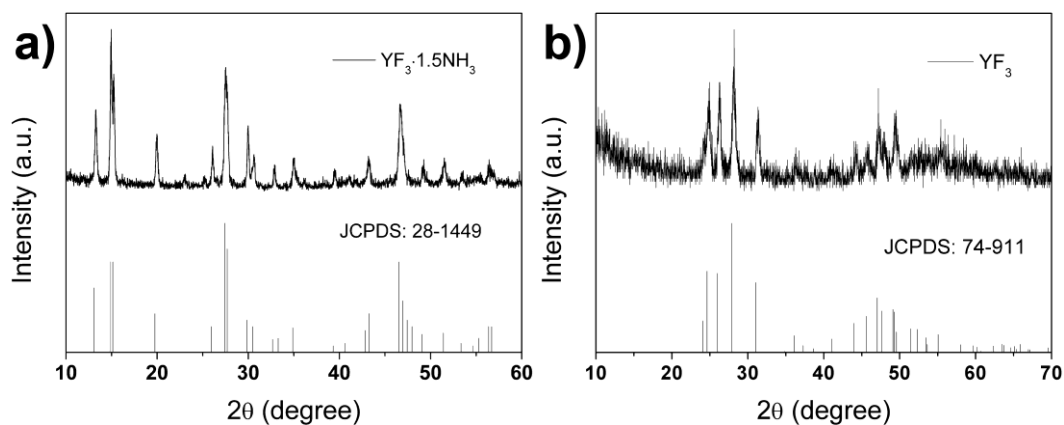

**Fig. S2** (a) XRD pattern of  $\text{YF}_3 \cdot 1.5\text{NH}_3$ ; (b) XRD pattern of  $\text{YF}_3$ .

When YOF fibers were calcinated at 200 °C in  $\text{NH}_3$ -HF atmosphere, the final product turned to be  $\text{YF}_3 \cdot 1.5\text{NH}_3$ . The corresponding XRD pattern is shown in Fig. S2a. In comparison, when the temperature in the fluorination process rose to 250 °C,  $\text{YF}_3$  was formed. The corresponding XRD pattern is shown in Fig. S2b. Compared with the noise signal in the pattern, intensity of diffraction peaks are weak, indicating poor crystalline of  $\text{YF}_3$  crystals.

#### 4. FTIR Spectra of Fibers

FTIR spectra of fibers are shown in Fig. S3. Characteristic absorption peaks of PVP and  $\text{RE}(\text{CF}_3\text{COO})_3$  can be detected. When the composite fibers were calcined at 500 °C, the weak peaks suggested that the organic ingredients were not eliminated completely. After the calcination at 600 °C, these peaks disappeared, indicating the removal of organic ingredients. The  $\text{CO}_2$  contributed to the band at about 2360  $\text{cm}^{-1}$ . The wide absorption bands at  $\sim 500 \text{ cm}^{-1}$  were assigned to YOF and  $\text{YF}_3$ .

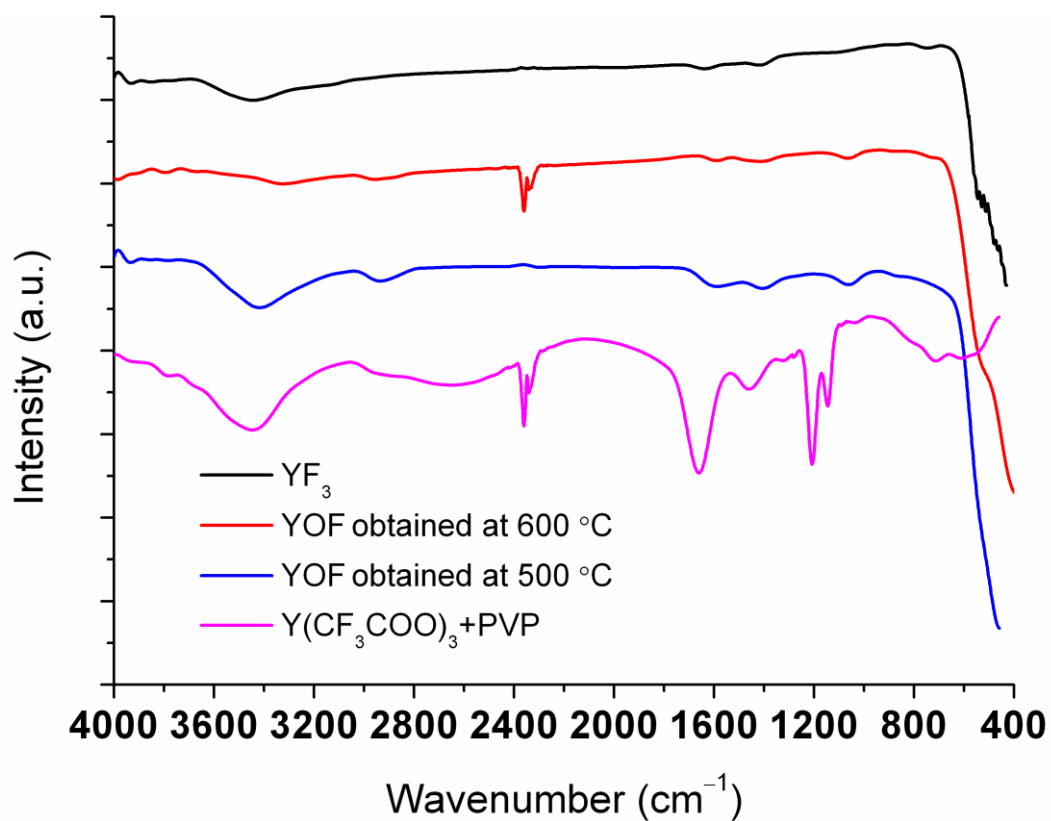

Fig. S3 FTIR spectra of fibers.

## 5. SEM Images and XRD Patterns of REOF and $\text{REF}_3$

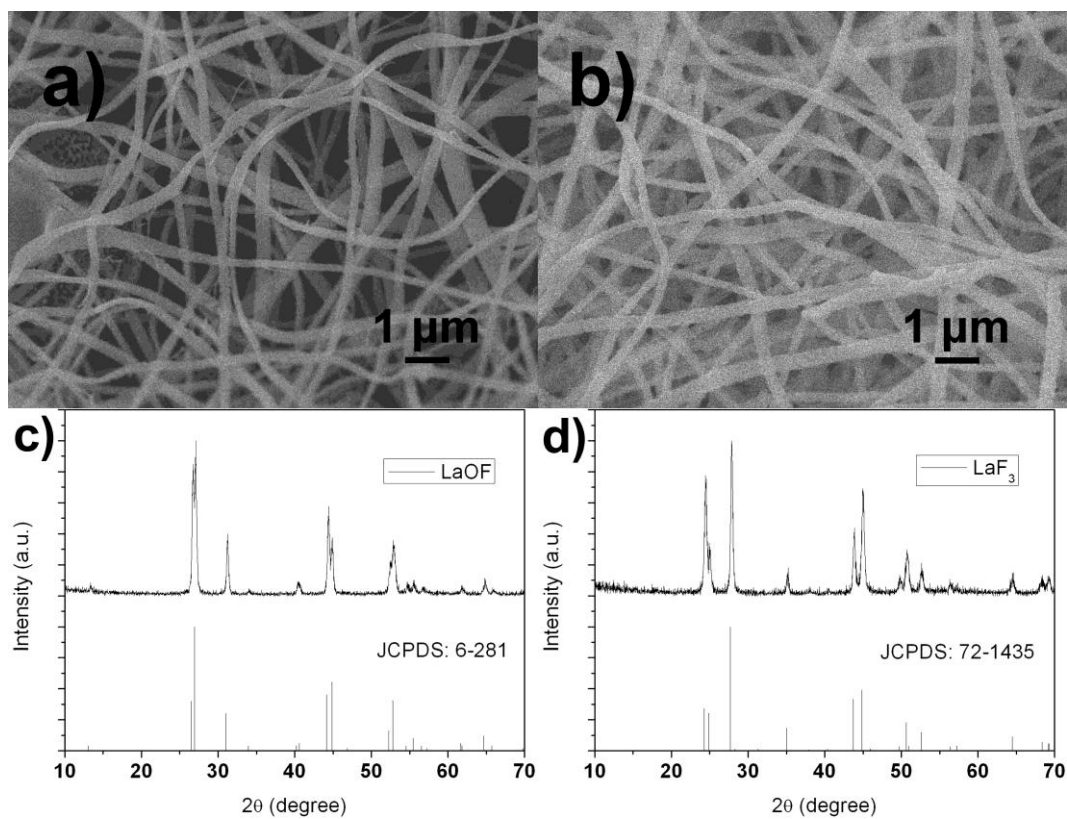

**Fig. S4** (a, b) SEM image of LaOF and LaF<sub>3</sub> fibers, respectively. (c, d) XRD patterns of LaOF and LaF<sub>3</sub> fibers, respectively.

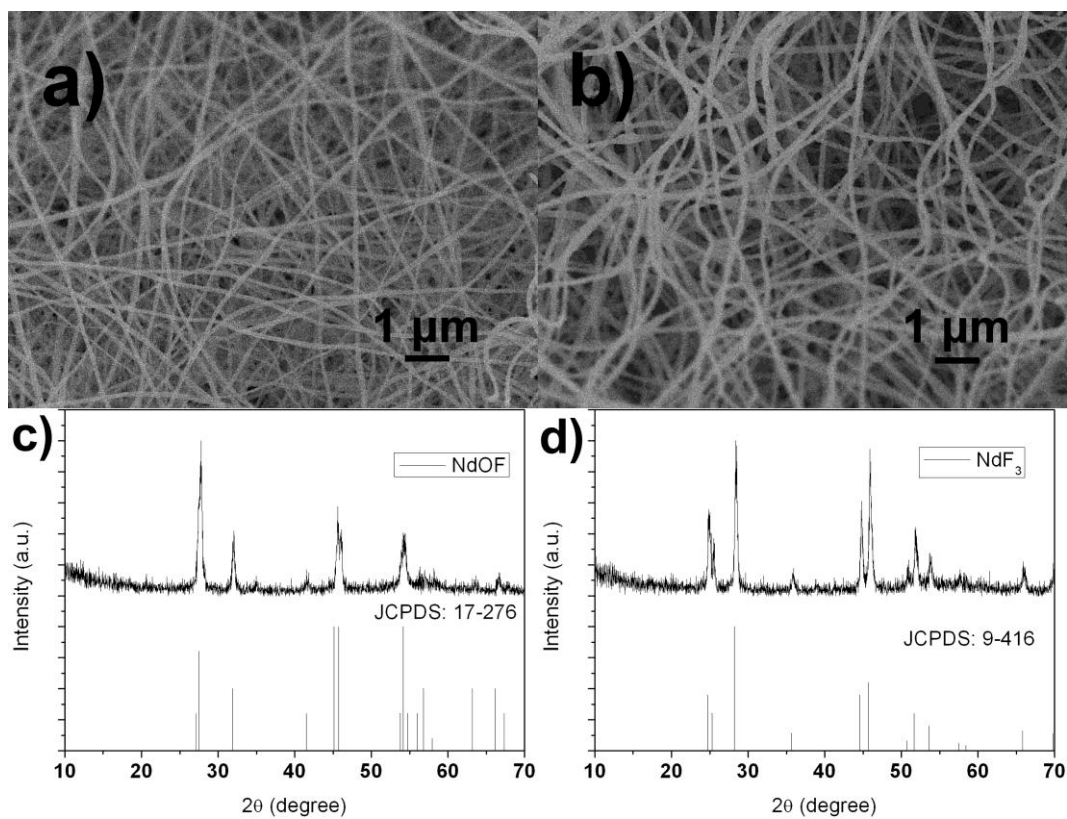

**Fig. S5** (a, b) SEM image of NdOF and NdF<sub>3</sub> fibers, respectively. (c, d) XRD patterns of NdOF and NdF<sub>3</sub> fibers, respectively.



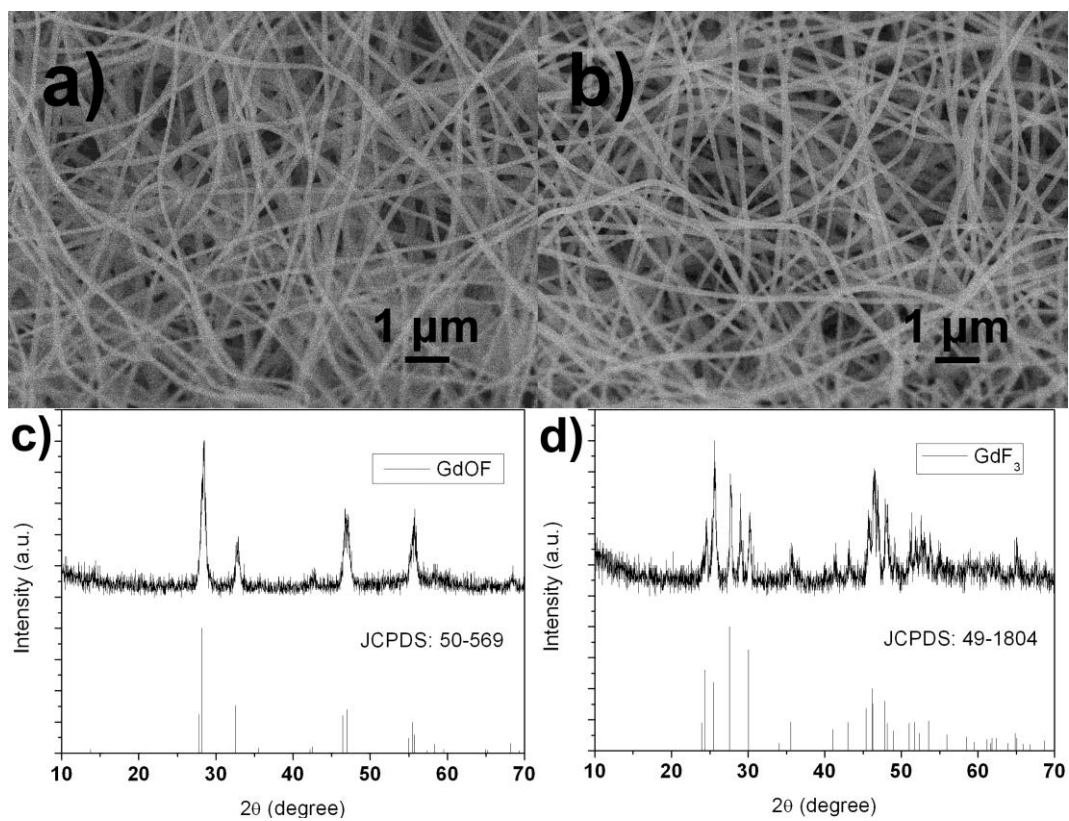

**Fig. S6** (a, b) SEM image of GdOF and GdF<sub>3</sub> fibers, respectively. (c, d) XRD patterns of GdOF and GdF<sub>3</sub> fibers, respectively.
